# Supplementary material
Source: PubMed Central journal article supplement (PMC3499048)
Supplement: supp_bgs158_OSM_Table_3.pdf [file supp_bgs158_OSM_Table_3.pdf]

Supplementary Table 3. Association between meat mutagen intake and colorectal adenoma and cancer risk stratified by UGT1A genotypes for which mutagen-SNP interactions were  $P < 0.05$ .

| Mutagen                      | SNP        | Geno type | adenoma |     |         |                          |         |                          | mutagen exposure |                | cancer  |     |         |                          |       |                          |             |                |
|------------------------------|------------|-----------|---------|-----|---------|--------------------------|---------|--------------------------|------------------|----------------|---------|-----|---------|--------------------------|-------|--------------------------|-------------|----------------|
|                              |            |           | low     |     | medium  |                          | high    |                          | $P_{trend}$      | $P_{interact}$ | low     |     | medium  |                          | high  |                          | $P_{trend}$ | $P_{interact}$ |
|                              |            |           | Ca/Co   | REF | Ca/Co   | OR <sup>a</sup> (95% CI) | Ca/Co   | OR <sup>a</sup> (95% CI) |                  |                | Ca/Co   | REF | Ca/Co   | OR <sup>a</sup> (95% CI) | Ca/Co | OR <sup>a</sup> (95% CI) |             |                |
| B[a]P                        | rs1105880  | AA        | 184/221 | REF | 219/227 | 1.17 (0.89, 1.53)        | 110/144 | 0.95 (0.69, 1.31)        | 0.47             | 0.04           | 56/76   | REF | 57/62   | 1.24 (0.75, 2.05)        | 26/35 | 0.98 (0.52, 1.83)        | 0.78        | 0.86           |
|                              |            | AG+GG     | 283/320 | REF | 267/342 | 0.90 (0.71, 1.13)        | 142/132 | 1.24 (0.93, 1.66)        | 0.07             |                | 88/95   | REF | 97/81   | 1.30 (0.86, 1.96)        | 40/45 | 1.02 (0.60, 1.75)        |             | 0.86           |
| B[a]P                        | rs12623271 | CC        | 151/184 | REF | 173/181 | 1.17 (0.87, 1.58)        | 89/123  | 0.91 (0.75, 1.15)        | 0.35             | 0.04           | 51/66   | REF | 45/51   | 1.12 (0.64, 1.94)        | 19/29 | 0.83 (0.41, 1.67)        | 0.52        | 0.72           |
|                              |            | CG+GG     | 315/357 | REF | 313/388 | 0.93 (0.75, 1.15)        | 163/153 | 1.25 (0.95, 1.64)        | 0.06             |                | 93/105  | REF | 109/92  | 1.34 (0.91, 2.00)        | 47/51 | 1.10 (0.66, 1.81)        |             | 0.98           |
| B[a]P                        | rs10168416 | CC        | 198/245 | REF | 237/250 | 1.18 (0.91, 1.53)        | 114/149 | 0.98 (0.71, 1.34)        | 0.57             | 0.07           | 60/80   | REF | 70/64   | 1.47 (0.91, 2.38)        | 29/40 | 0.96 (0.53, 1.74)        | 0.56        | 0.78           |
|                              |            | CG+GG     | 267/295 | REF | 249/319 | 0.87 (0.69, 1.10)        | 138/127 | 1.22 (0.91, 1.64)        | 0.08             |                | 84/91   | REF | 84/78   | 1.17 (0.76, 1.79)        | 37/40 | 1.07 (0.61, 1.86)        |             | 0.93           |
| B[a]P                        | rs6714486  | TT        | 396/480 | REF | 416/490 | 1.04 (0.87, 1.26)        | 218/236 | 1.15 (0.91, 1.45)        | 0.25             | 0.45           | 129/137 | REF | 135/114 | 1.26 (0.89, 1.78)        | 52/61 | 0.90 (0.57, 1.42)        | 0.45        | 0.06           |
|                              |            | TA+AA     | 55/53   | REF | 55/68   | 0.77 (0.46, 1.30)        | 30/36   | 0.84 (0.45, 1.57)        | 0.79             |                | 7/18    | REF | 16/14   | 2.84 (0.84, 9.62)        | 12/8  | 4.21 (1.04, 17.1)        |             | 0.10           |
| B[a]P                        | rs17868299 | CC        | 408/480 | REF | 419/499 | 1.00 (0.83, 1.21)        | 219/237 | 1.12 (0.89, 1.41)        | 0.31             | 0.61           | 136/147 | REF | 135/125 | 1.18 (0.84, 1.66)        | 54/67 | 0.92 (0.59, 1.42)        | 0.52        | 0.05           |
|                              |            | CT + TT   | 58/61   | REF | 67/69   | 1.02 (0.62, 1.67)        | 33/37   | 0.93 (0.52, 1.71)        | 0.79             |                | 6/19    | REF | 17/12   | 4.67 (1.31, 16.7)        | 12/8  | 6.04 (1.39, 24.2)        |             | 0.06           |
| PhIP                         | rs871514   | TT        | 134/165 | REF | 145/161 | 1.16 (0.83, 1.61)        | 66/103  | 0.83 (0.56, 1.24)        | 0.26             | 0.09           | 55/47   | REF | 38/48   | 0.66 (0.36, 1.18)        | 19/20 | 0.82 (0.39, 1.75)        | 0.68        | 0.63           |
|                              |            | TC+CC     | 338/382 | REF | 346/396 | 0.99 (0.79, 1.22)        | 175/174 | 1.14 (0.88, 1.49)        | 0.28             |                | 107/115 | REF | 90/102  | 0.97 (0.65, 1.44)        | 52/55 | 1.04 (0.65, 1.66)        |             | 0.86           |
| PhIP                         | rs28969701 | CC        | 449/512 | REF | 464/535 | 1.00 (0.84, 1.21)        | 238/264 | 1.05 (0.84, 1.31)        | 0.64             | 0.08           | 149/160 | REF | 119/145 | 0.89 (0.64, 1.25)        | 65/71 | 0.98 (0.65, 1.48)        | 0.99        | 0.38           |
|                              |            | CT + TT   | 24/34   | REF | 26/24   | 1.33 (0.59, 3.01)        | 3/15    | 0.29 (0.07, 1.17)        | 0.09             |                | 14/4    | REF | 10/7    | 0.17 (0.02, 1.29)        | 7/5   | 0.21 (0.02, 2.03)        |             | 0.43           |
| PhIP                         | rs2018985  | AA        | 164/202 | REF | 177/199 | 1.15 (0.85, 1.55)        | 75/120  | 0.82 (0.57, 1.19)        | 0.21             | 0.05           | 60/57   | REF | 45/58   | 0.72 (0.42, 1.24)        | 24/29 | 0.78 (0.40, 1.51)        | 0.54        | 0.48           |
|                              |            | AG+GG     | 309/345 | REF | 314/359 | 0.97 (0.77, 1.21)        | 164/159 | 1.15 (0.88, 0.52)        | 0.26             |                | 102/107 | REF | 84/94   | 0.94 (0.63, 1.43)        | 48/47 | 1.09 (0.66, 1.80)        |             | 0.70           |
| PhIP                         | rs10197460 | GG        | 169/197 | REF | 181/198 | 1.10 (0.82, 1.49)        | 75/112  | 0.82 (0.56, 1.19)        | 0.24             | 0.09           | 64/60   | REF | 47/62   | 0.68 (0.40, 1.15)        | 22/29 | 0.68 (0.34, 1.34)        | 0.31        | 0.43           |
|                              |            | GT+TT     | 283/327 | REF | 281/329 | 0.97 (0.77, 1.23)        | 148/150 | 1.13 (0.84, 1.50)        | 0.36             |                | 97/93   | REF | 77/82   | 0.94 (0.61, 1.44)        | 46/44 | 1.05 (0.63, 1.75)        |             | 0.82           |
| MeIQx                        | rs7571337  | TT        | 10/144  | REF | 137/151 | 1.38 (0.97, 1.96)        | 79/70   | 1.78 (1.16, 2.73)        | 0.01             | 0.07           | 30/43   | REF | 32/37   | 1.24 (0.64, 2.42)        | 20/19 | 1.49 (0.65, 3.41)        | 0.36        | 0.09           |
|                              |            | TC+CC     | 345/403 | REF | 360/401 | 1.06 (0.86, 1.30)        | 176/205 | 1.02 (0.79, 1.32)        | 0.9              |                | 113/112 | REF | 116/102 | 1.15 (0.79, 1.67)        | 40/57 | 0.71 (0.43, 1.17)        |             | 0.15           |
| DiMeIQx                      | rs6717546  | GG        | 198/215 | REF | 192/232 | 0.91 (0.69, 1.19)        | 103/97  | 1.18 (0.84, 1.67)        | 0.3              | 0.35           | 68/75   | REF | 60/66   | 1.04 (0.64, 1.70)        | 35/25 | 1.53 (0.82, 2.86)        | 0.16        | 0.04           |
|                              |            | GA+AA     | 291/335 | REF | 269/326 | 0.94 (0.75, 1.19)        | 151/179 | 0.97 (0.73, 1.28)        | 0.86             |                | 90/89   | REF | 72/85   | 0.83 (0.53, 1.27)        | 34/50 | 0.68 (0.39, 1.16)        |             | 0.18           |
| Combined nitrate and nitrite | rs12466997 | TT        | 391/481 | REF | 439/477 | 1.13 (0.94, 1.38)        | 234/254 | 1.15 (0.91, 1.46)        | 0.31             | 0.41           | 117/121 | REF | 137/145 | 1.00 (0.70, 1.43)        | 65/62 | 1.14 (0.72, 1.80)        | 0.57        | 0.08           |
|                              |            | CT+CC     | 43/77   | REF | 65/57   | 2.33 (1.34, 4.07)        | 29/32   | 1.98 (1.00, 3.94)        | 0.12             |                | 19/28   | REF | 11/24   | 0.71 (0.28, 1.83)        | 13/6  | 4.58 (1.29, 16.2)        |             | 0.03           |

Note: rs 2011404 did not meet the quality control measured in the adenoma dataset

Meat mutagens classified as low (0-39th percentile), medium (40th-79th percentile), and high  $\geq$ 80th percentile intake

<sup>a</sup> Assuming a dominant model, adjusted for age at selection, sex, ethnicity

<sup>b</sup> SNP located within 10 kb downstream of *TMEM63A*.

<sup>c</sup> SNP located within 10 kb upstream of *LEFTY3*.
